# Supplementary material for: Genetic and Epigenetic Alterations of TERT Are Associated with Inferior Outcome in Adolescent and Young Adult Patients with Melanoma
Source: PubMed Central journal article supplement (PMC5381111; doi:10.1038/srep45704), 2017-04-05
Supplement: srep45704-s1.pdf [file srep45704-s1.pdf]

**Genetic and Epigenetic Alterations of *TERT* Are Associated with Inferior Outcome in Adolescent and Young Adult Patients with Melanoma**

Brittani Seynnaeve, MD<sup>1\*</sup>; Seungjae Lee, PhD<sup>2\*</sup>; Sumit Borah, PhD<sup>2</sup>; Yongseok Park, PhD<sup>3</sup>;  
Alberto Pappo, MD<sup>4</sup>; John M. Kirkwood, MD<sup>5</sup>; and Armita Bahrami, MD<sup>2\*\*</sup>

**Supplementary Table 1.** The rs2853669 single nucleotide polymorphism in 27 AYA patients with melanoma

| <b>Melanoma Subtype</b>      | <b><i>TERT</i> promoter rs2853669<br/>-245A&gt;G</b> |
|------------------------------|------------------------------------------------------|
| <b>Conventional Melanoma</b> |                                                      |
| 1                            | pos                                                  |
| 2                            | neg                                                  |
| 4                            | pos                                                  |
| 5***                         | pos                                                  |
| 6                            | pos                                                  |
| 7                            | pos                                                  |
| 8                            | pos                                                  |
| 9                            | neg                                                  |
| 11                           | neg                                                  |
| 12                           | pos                                                  |
| 13                           | neg                                                  |
| 14                           | neg                                                  |
| 16                           | neg                                                  |
| 19                           | neg                                                  |
| 21                           | neg                                                  |
| 22                           | pos                                                  |
| 23                           | pos                                                  |
| 25****                       | pos                                                  |
| 27                           | pos                                                  |
| 29                           | pos                                                  |
| <b>Nevoid Melanoma</b>       |                                                      |
| 3                            | neg                                                  |
| 10                           | neg                                                  |
| <b>Nevoid Melanoma</b>       |                                                      |
| 15                           | pos                                                  |
| 17                           | neg                                                  |
| 18                           | pos                                                  |
| 20                           | neg                                                  |
| 24                           | pos                                                  |
| 26                           | neg                                                  |

**Supplementary Table 2.** *TERT* promoter methylation analysis by MassARRAY in 28 AYA melanoma samples

| Sample ID | TERT_Cp<br>G_1 | TERT_Cp<br>G_2_3_4 | TERT_Cp<br>G_5_6_7 | TERT_Cp<br>G_8_9 | TERT_Cp<br>G_10_11_<br>12 | TERT_Cp<br>G_13_14 | TERT_Cp<br>G_15_16 | TERT_Cp<br>G_17 | TERT_Cp<br>G_18_19_<br>20_21 | TERT_CpG_22 | TERT_Cp<br>G_23 | TERT_Cp<br>G_24_25 | TERT_Cp<br>G_26 |
|-----------|----------------|--------------------|--------------------|------------------|---------------------------|--------------------|--------------------|-----------------|------------------------------|-------------|-----------------|--------------------|-----------------|
| 13        | 13.0%          | 17.0%              | 9.0%               | 8.0%             | NA                        | 2.0%               | 16.0%              | 5.0%            | 7.0%                         | 6.0%        | 2.0%            | 6.0%               | NA              |
| 1         | 15.0%          | 16.0%              | 10.0%              | 9.0%             | NA                        | 8.0%               | 17.0%              | 4.0%            | 11.0%                        | 8.0%        | 0.0%            | 8.0%               | NA              |
| 8         | 35.0%          | 34.0%              | 24.0%              | 19.0%            | NA                        | 14.0%              | 22.0%              | 5.0%            | 16.0%                        | 12.0%       | 5.0%            | 5.0%               | NA              |
| 19        | 13.0%          | 15.0%              | 15.0%              | 9.0%             | NA                        | 5.0%               | 19.0%              | 8.0%            | 13.0%                        | 9.0%        | 4.0%            | 11.0%              | NA              |
| 23        | 32.0%          | 23.0%              | 25.0%              | 12.0%            | NA                        | 17.0%              | 29.0%              | 11.0%           | 13.0%                        | 14.0%       | 4.0%            | 8.0%               | NA              |
| 29        | 33.0%          | 25.0%              | 18.0%              | 16.0%            | NA                        | 16.0%              | 24.0%              | 7.0%            | 14.0%                        | 12.0%       | 5.0%            | 13.0%              | NA              |
| 11        | 36.0%          | 29.0%              | 22.0%              | 27.0%            | NA                        | 11.0%              | 26.0%              | 14.0%           | 16.0%                        | 12.0%       | 13.0%           | 9.0%               | NA              |
| 27        | 37.0%          | 28.0%              | 21.0%              | 22.0%            | NA                        | 8.0%               | 21.0%              | 8.0%            | 16.0%                        | 12.0%       | 13.0%           | 10.0%              | NA              |
| 12        | 33.0%          | 33.0%              | 28.0%              | 29.0%            | NA                        | 7.0%               | 20.0%              | 16.0%           | 17.0%                        | 8.0%        | 13.0%           | 14.0%              | NA              |
| 7         | 28.0%          | 24.0%              | 23.0%              | 13.0%            | NA                        | 12.0%              | 18.0%              | 12.0%           | 15.0%                        | 14.0%       | 7.0%            | 14.0%              | NA              |
| 14        | 19.0%          | 26.0%              | 26.0%              | 14.0%            | NA                        | 15.0%              | 24.0%              | 5.0%            | 17.0%                        | 17.0%       | 7.0%            | 12.0%              | NA              |
| 6         | 64.0%          | 52.0%              | 49.0%              | 34.0%            | NA                        | 32.0%              | 46.0%              | 31.0%           | 36.0%                        | 15.0%       | 29.0%           | 16.0%              | NA              |
| 25        | 20.0%          | 35.0%              | 40.0%              | 51.0%            | NA                        | 10.0%              | 30.0%              | 6.0%            | 11.0%                        | 24.0%       | 19.0%           | 28.0%              | NA              |
| 5         | 35.0%          | 41.0%              | 39.0%              | 35.0%            | NA                        | 18.0%              | 32.0%              | 12.0%           | 22.0%                        | 25.0%       | 25.0%           | 26.0%              | NA              |
| 2         | 34.0%          | 31.0%              | 24.0%              | 31.5%            | NA                        | 19.0%              | 43.5%              | 16.5%           | 26.0%                        | 24.0%       | 27.5%           | 31.0%              | NA              |
| 4         | 59.0%          | 44.0%              | 41.0%              | 45.0%            | NA                        | 37.0%              | 50.0%              | 34.0%           | 33.0%                        | 26.0%       | 30.0%           | 29.0%              | NA              |
| 21        | 72.0%          | 63.0%              | 43.0%              | 60.0%            | NA                        | 34.0%              | 46.0%              | 20.0%           | 37.0%                        | 31.0%       | 30.0%           | 57.0%              | NA              |
| 16        | 40.0%          | 50.0%              | 55.0%              | 61.0%            | NA                        | 12.0%              | 48.0%              | 8.0%            | 38.0%                        | 51.0%       | 56.0%           | 19.0%              | NA              |
| 22        | 66.0%          | 54.0%              | 38.0%              | 34.0%            | NA                        | 29.0%              | 44.0%              | 20.0%           | 28.0%                        | 42.0%       | 35.0%           | 56.0%              | NA              |
| 9         | 61.0%          | 59.0%              | 40.0%              | 74.0%            | NA                        | 47.0%              | 74.0%              | 51.0%           | 57.0%                        | 73.0%       | 70.0%           | 56.0%              | NA              |
| 3         | 2.0%           | 8.0%               | 6.0%               | 0.0%             | NA                        | 1.0%               | 15.0%              | 4.0%            | 7.0%                         | 4.0%        | 0.0%            | 2.0%               | NA              |
| 10        | 8.0%           | 8.0%               | 18.0%              | 19.0%            | NA                        | 5.0%               | 18.0%              | 3.0%            | 5.0%                         | 3.0%        | 34.0%           | 7.0%               | NA              |
| 17        | 27.0%          | 18.0%              | 8.0%               | 17.0%            | NA                        | 2.0%               | 13.0%              | 6.0%            | 9.0%                         | 2.0%        | 3.0%            | 5.0%               | NA              |
| 26        | 30.0%          | 29.0%              | 28.0%              | 21.0%            | NA                        | 15.0%              | 19.0%              | 6.0%            | 12.0%                        | 10.0%       | 1.0%            | 13.0%              | NA              |
| 15        | 19.0%          | 18.0%              | 15.0%              | 11.0%            | NA                        | 8.0%               | 26.0%              | 7.0%            | 10.0%                        | 12.0%       | 5.0%            | 7.0%               | NA              |
| 24        | 36.0%          | 21.0%              | 22.0%              | 25.0%            | NA                        | 8.0%               | 16.0%              | 7.0%            | 14.0%                        | 10.0%       | 6.0%            | 9.0%               | NA              |
| 18        | 28.0%          | 24.0%              | 15.0%              | 16.0%            | NA                        | 12.0%              | 17.0%              | 7.0%            | 14.0%                        | 9.0%        | 6.0%            | 11.0%              | NA              |
| 20        | 38.0%          | 33.0%              | 21.0%              | 22.0%            | NA                        | 26.0%              | 33.0%              | 21.0%           | 16.0%                        | 10.0%       | 17.0%           | 16.0%              | NA              |

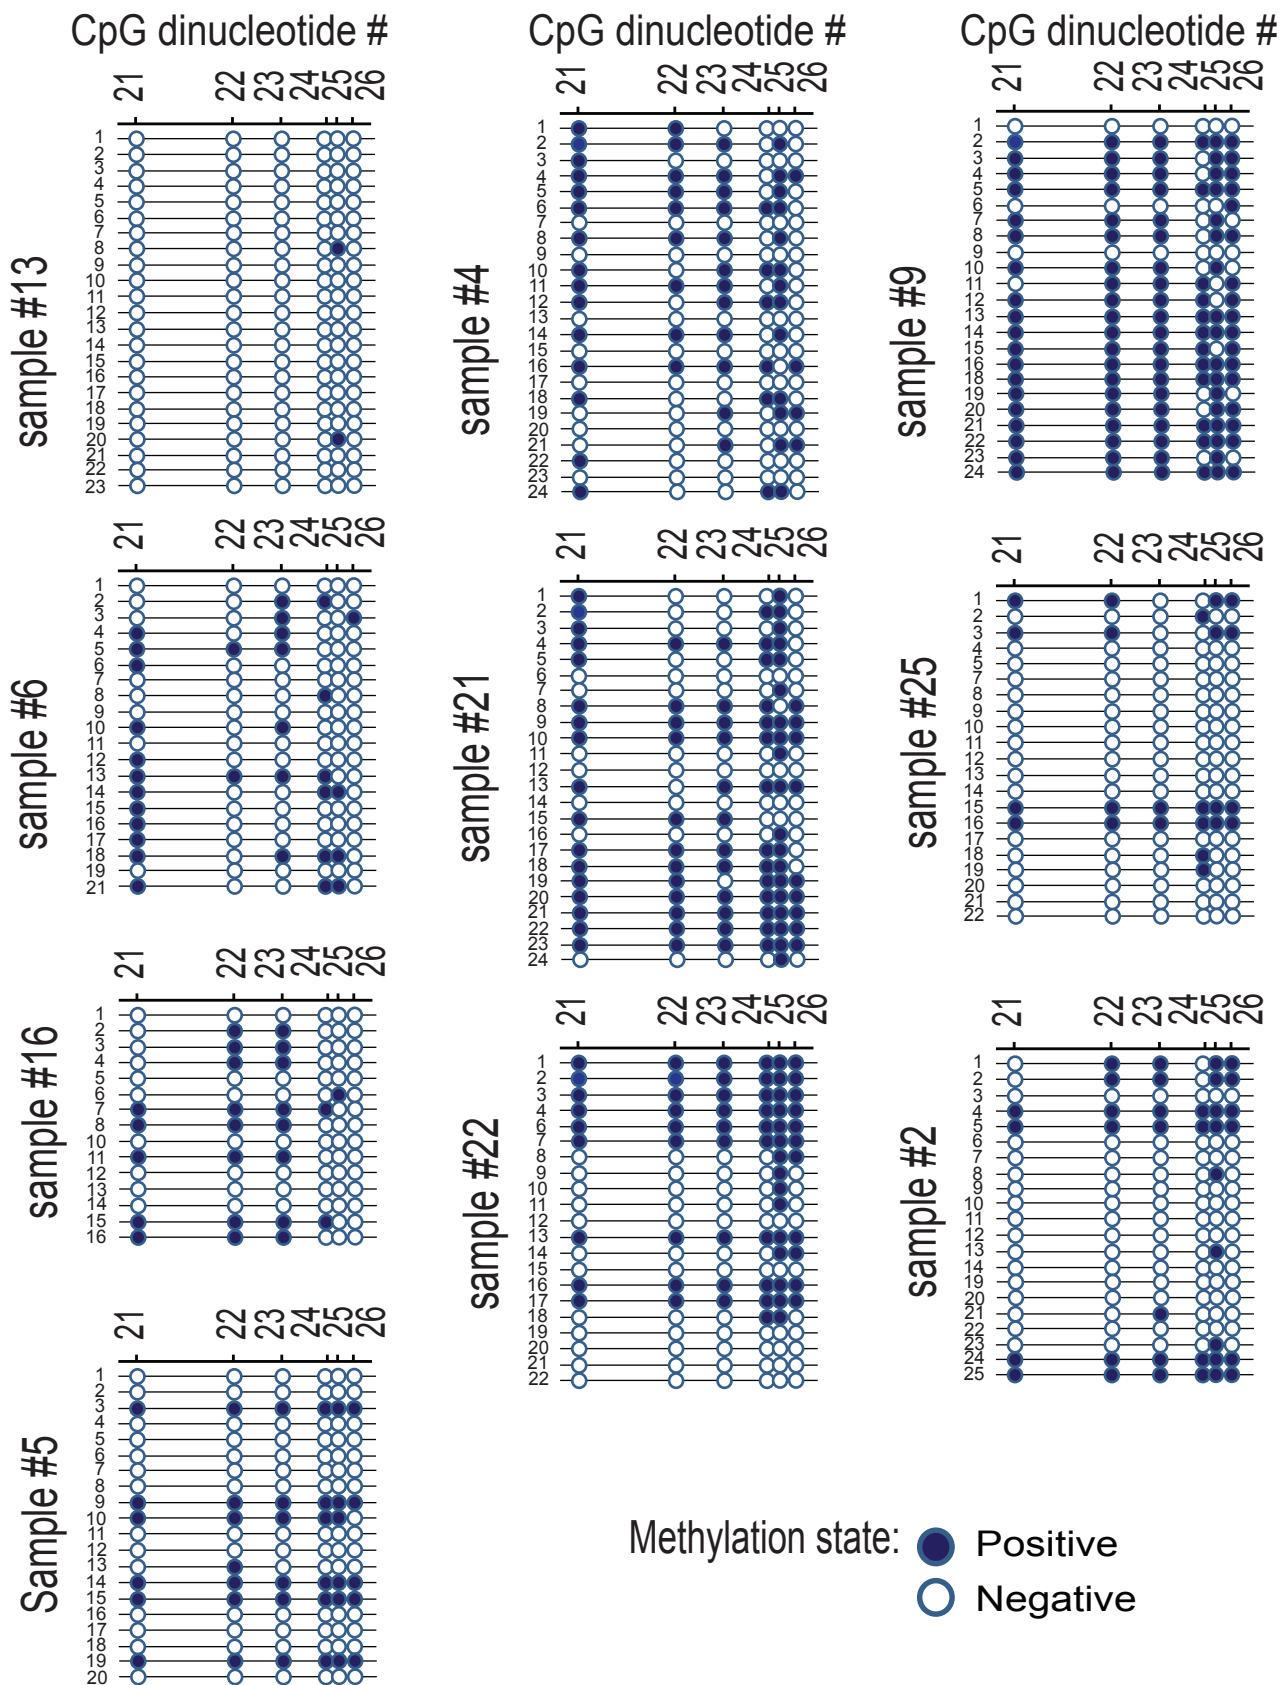

Supplementary Figure 1

Cloning and sequencing results for the Upstream of the Transcription Start Site (UTSS) region of the TERT promoter in 10 AYA melanocytic neoplasms
